# Supplementary material for: Cobalt-doped porphyrin-based porous organic polymer-modified separator for high-performance lithium–sulfur batteries
Source: Royal Society of Chemistry journal article supplement (doi:10.1039/d0ta10607k), 2021-01-01
Supplement: d0ta10607k1.pdf [file d0ta10607k1.pdf]

## Supplementary Information

### **Cobalt-doped porphyrin-based porous organic polymer-modified separator for high-performance lithium–sulfur batteries**

Shunyou Hu<sup>a</sup>, Mingjie Yi<sup>a</sup>, Xiyang Huang<sup>a</sup>, Dong Wu<sup>a</sup>, Beibei Lu<sup>a</sup>, Tiansheng Wang<sup>a</sup>, Na Li<sup>a</sup>, Zhenye Zhu<sup>a</sup>,  
Xiangli Liu<sup>c\*</sup>, Jiaheng Zhang<sup>a,b \*</sup>

*<sup>a</sup>Research Centre of Printed Flexible Electronics, School of Materials Science and  
Engineering, Harbin Institute of Technology,  
Shenzhen 518055, China*

*<sup>b</sup>State Key Laboratory of Advanced Welding and Joining, Harbin Institute of  
Technology, Shenzhen 518055, China.*

*<sup>c</sup>Shenzhen Engineering Laboratory of Aerospace Detection and Imaging, Department  
of Materials Science and Engineering, Harbin Institute of Technology (Shenzhen),  
Shenzhen 518055, China*

Corresponding author:

Jiaheng Zhang, Email: zhangjiaheng@hit.edu.cn

Xiangli Liu, Email: xiangliliu@hit.edu.cn

## 1. Synthesis of TPP

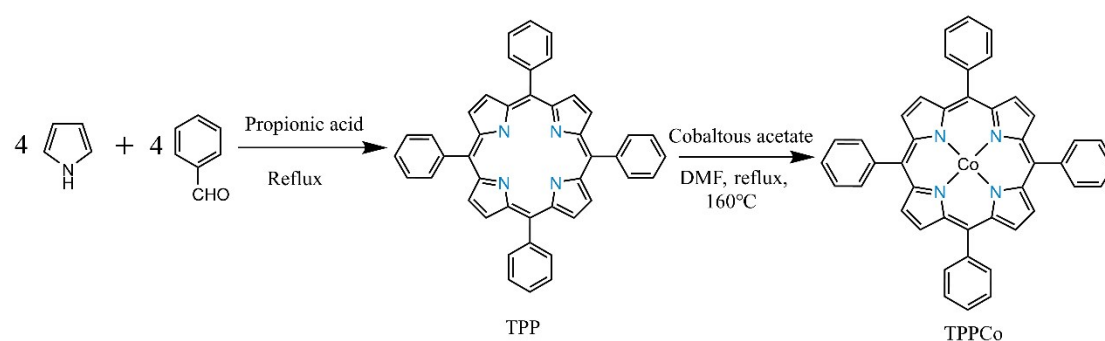

Scheme 1. The synthesis process of TPP and TPPCo.

TPP: In a typical way, benzaldehyde (50 mmol) was added to a two-necked round-bottomed flask (250 mL) containing 120 mL of propionic acid, and heated to 140°C, followed by addition of freshly distilled pyrrole (50 mmol). After refluxing for 2 h, the solution was cooled to room temperature naturally and added 120 mL of absolute ethanol. Subsequently, the as-obtained precipitate was filtered, washed with methanol and dried in the room temperature. The precipitate was further purified with silica gel column chromatography using  $\text{CH}_2\text{Cl}_2$  as eluent. After removal of eluent by rotary evaporation, the product was dried at 80 °C in vacuum for 24 h and gave the purple powder (TPP).

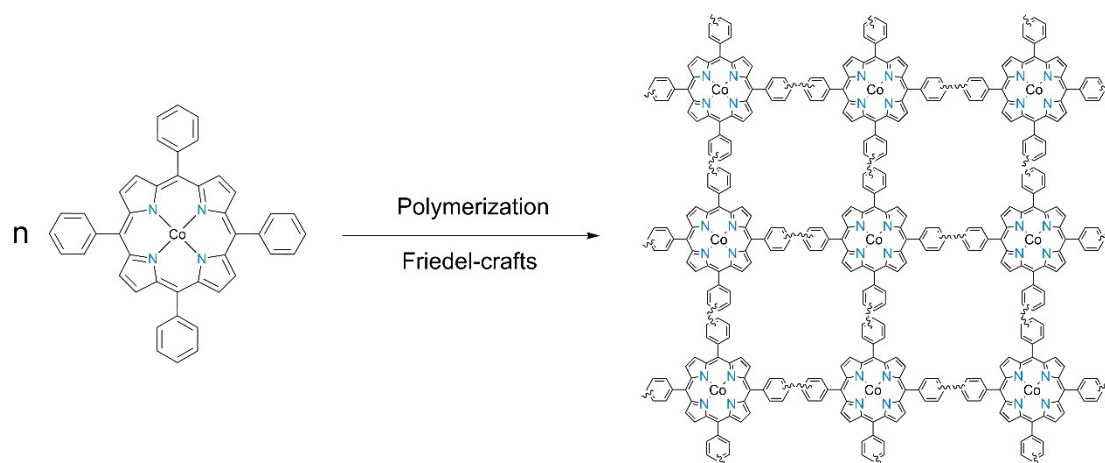

Scheme 2. The synthesis of PTPPCo using procedures from He and co-workers.<sup>1</sup>

## 2. Shuttle current test

For the shuttle current test, LiNO<sub>3</sub>-free electrolyte was employed to prevent the passivation of Li anode. First, batteries were galvanostatic charge to 2.8 V at 0.2 C current density. Then, the batteries were galvanostatic discharge to 2.38 V to monitor the current changes. After about 25000 s, the current was stable within a fixed range which is regarded as shuttle current<sup>2</sup>.

### 3. Calculations of specific energy density

The gravimetric energy density was calculated from the following formula.<sup>3, 4</sup>

$$W_{\text{cell}} = \frac{E_{\text{cell}} \times Q \times m_s}{(m_{\text{Li}})_{\text{anode}} + (m_s)_{\text{cathode}}} \quad (\text{Equation 1})$$

$$P_{\text{cell}} = W_{\text{cell}} \times C \text{ rate } (h^{-1}) \quad (\text{Equation 2})$$

Where  $W_{\text{cell}}$  is the energy density (Wh kg<sup>-1</sup>),  $E_{\text{cell}}$  is the average reversible potential (vs. Li/Li<sup>+</sup>),  $Q$  is the specific capacity of sulfur (mAh g<sup>-1</sup>),  $m_s$  is the mass of sulfur in the cathode,  $m_{\text{Li}}$  is the mass of Li electrode (100% excess),  $P_{\text{cell}}$  is the power density (W kg<sup>-1</sup>).

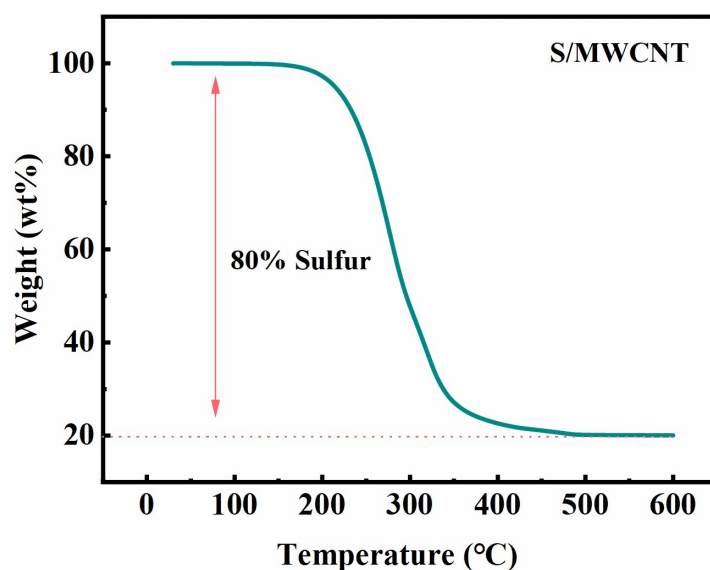

**Fig. S1.** TG curve of S/MWCNT composite.

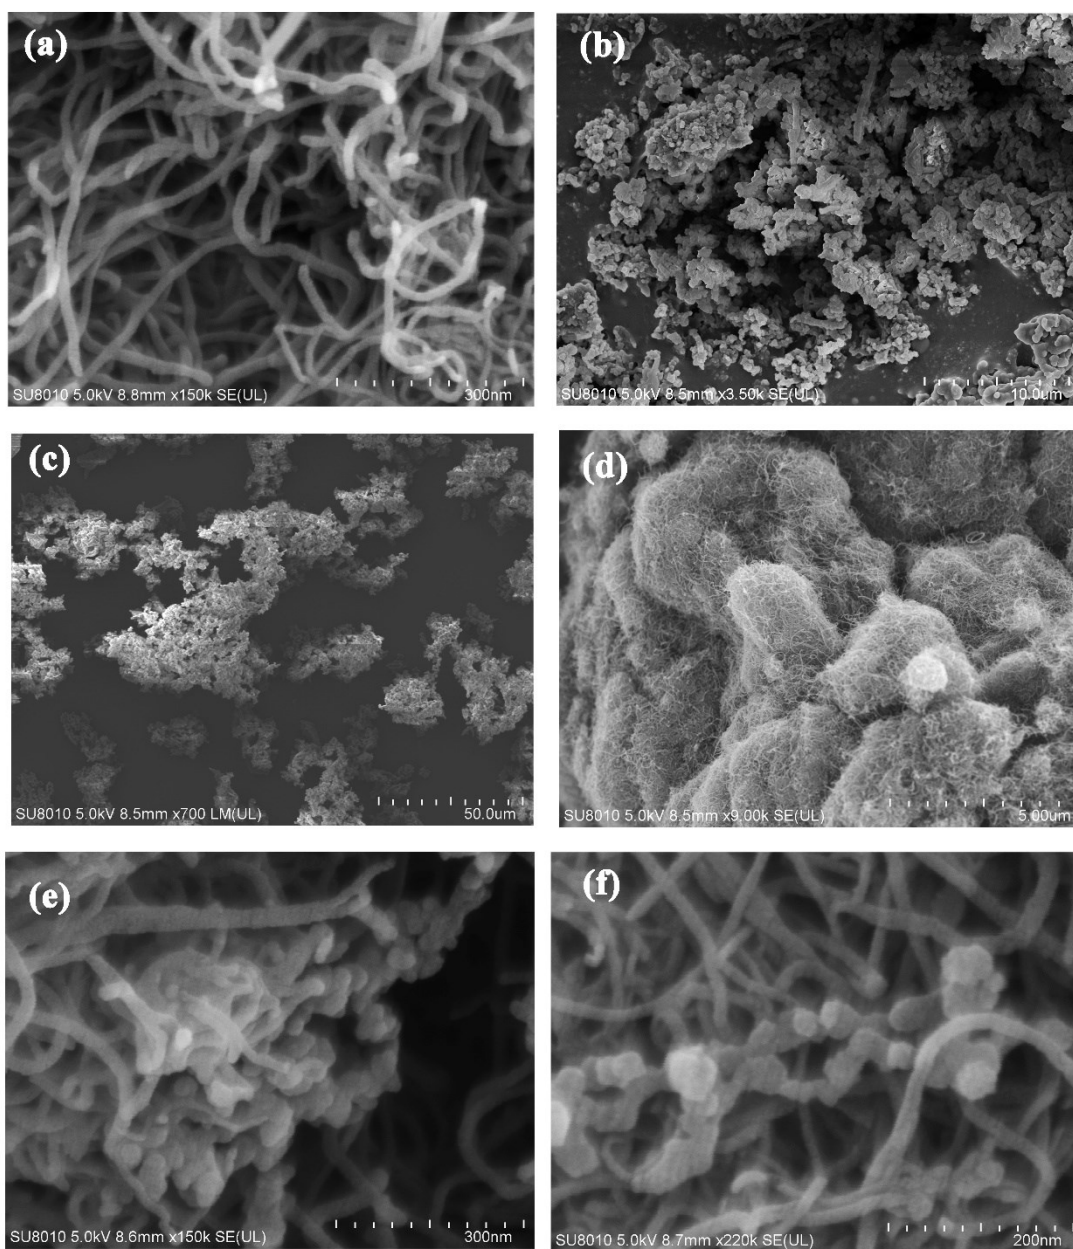

**Fig. S2.** SEM images of MWCNT (a), PTPPCo (b, c), PTPPCo/MWCNT(d-f).

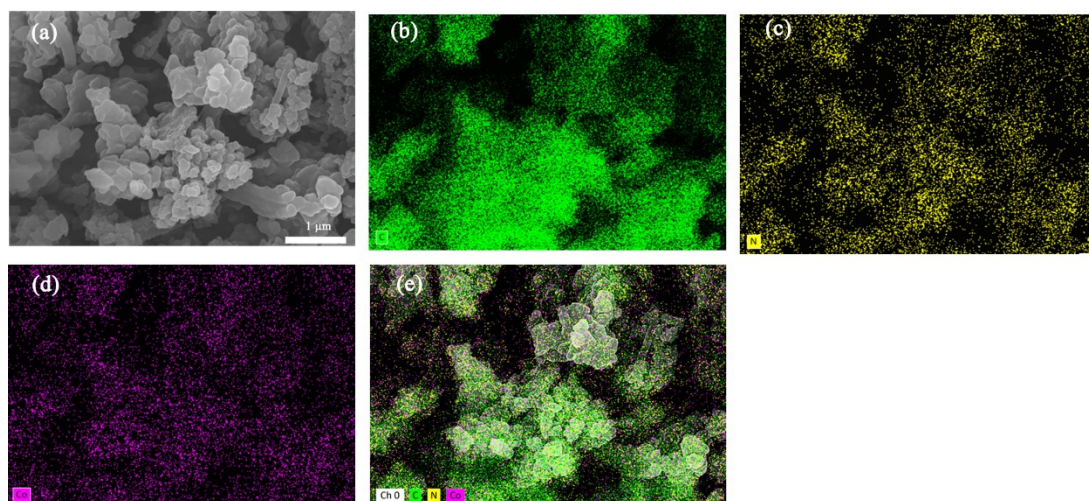

**Fig. S3.** Elemental mapping images of the PTPPCo.

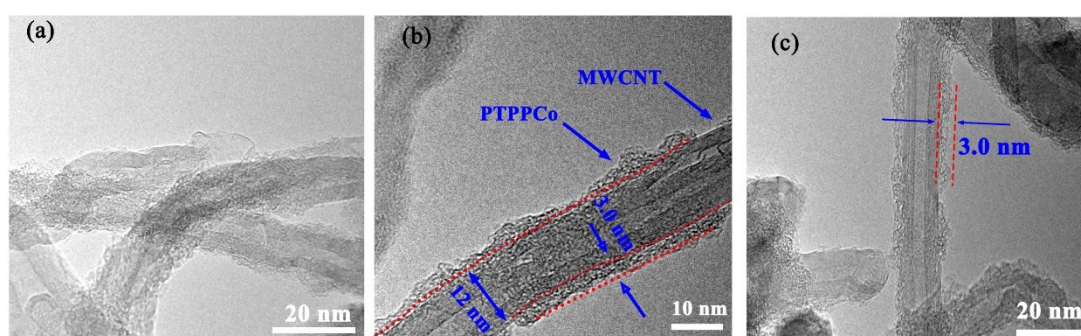

**Fig. S4.** The TEM images of PTPPCo/MWCNT.



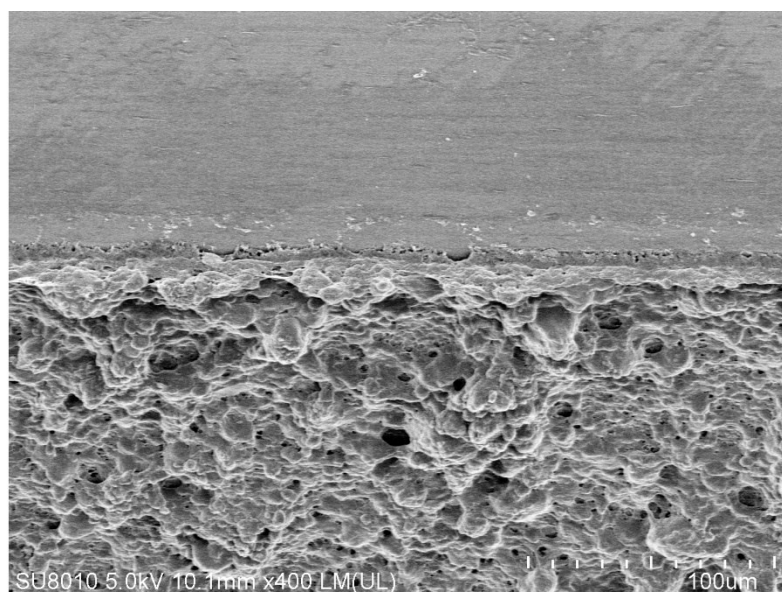

**Fig. S5.** SEM images of PTPPCo/MWCNT separators.

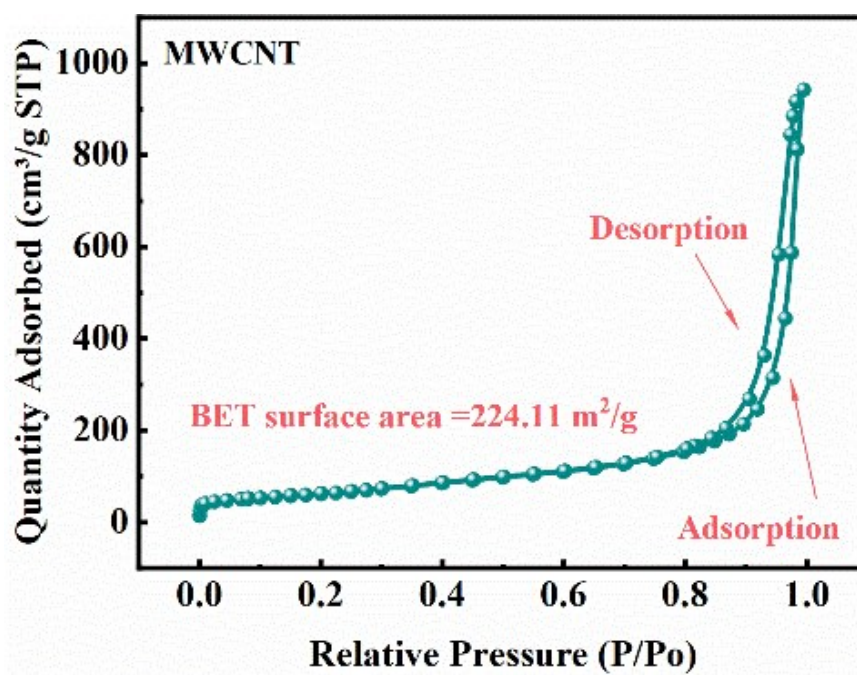

**Fig. S6.** Adsorption-desorption isotherms of MWCNT.

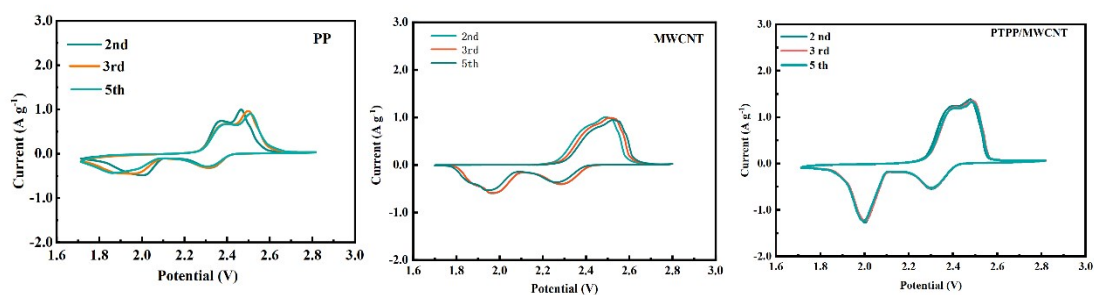

**Fig. S7.** CV curves of Li-S cells at 0.1 mV/s.

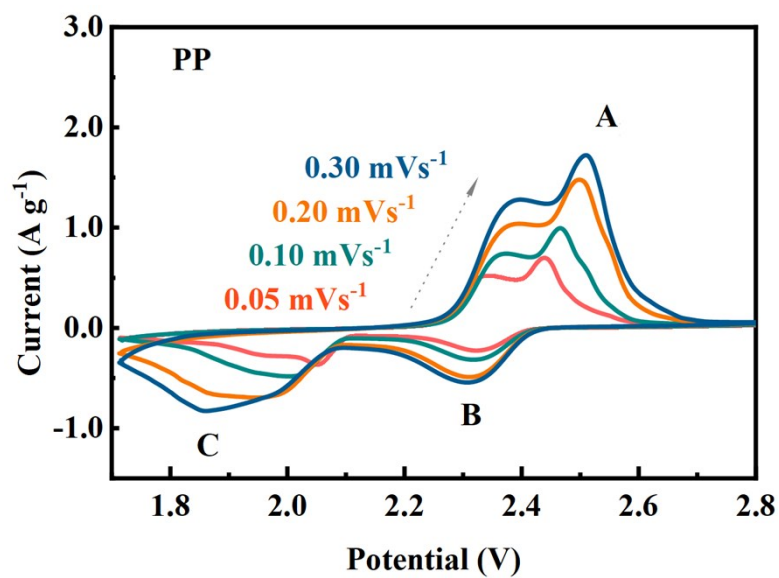

**Fig. S8.** CV curves of PP at various scan rate.



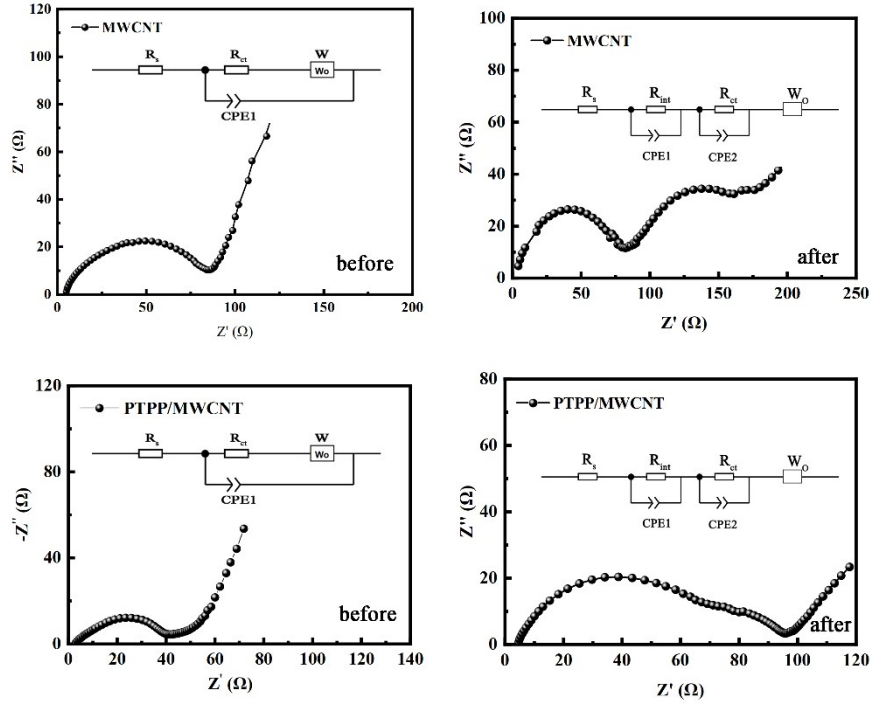

**Fig. S9.** The EIS of the cells with MWCNT and PTPP/MWCNT before and after cycling.

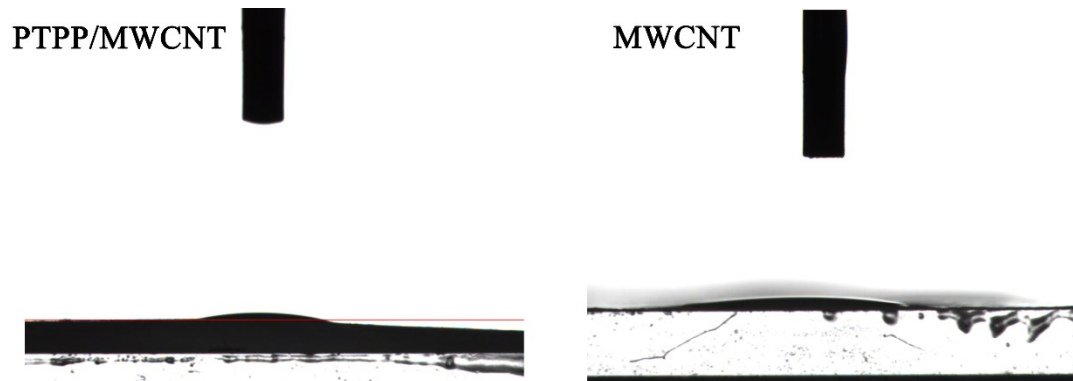

**Fig. S10.** The contact angle of PTPP/MWCNT and MWCNT.

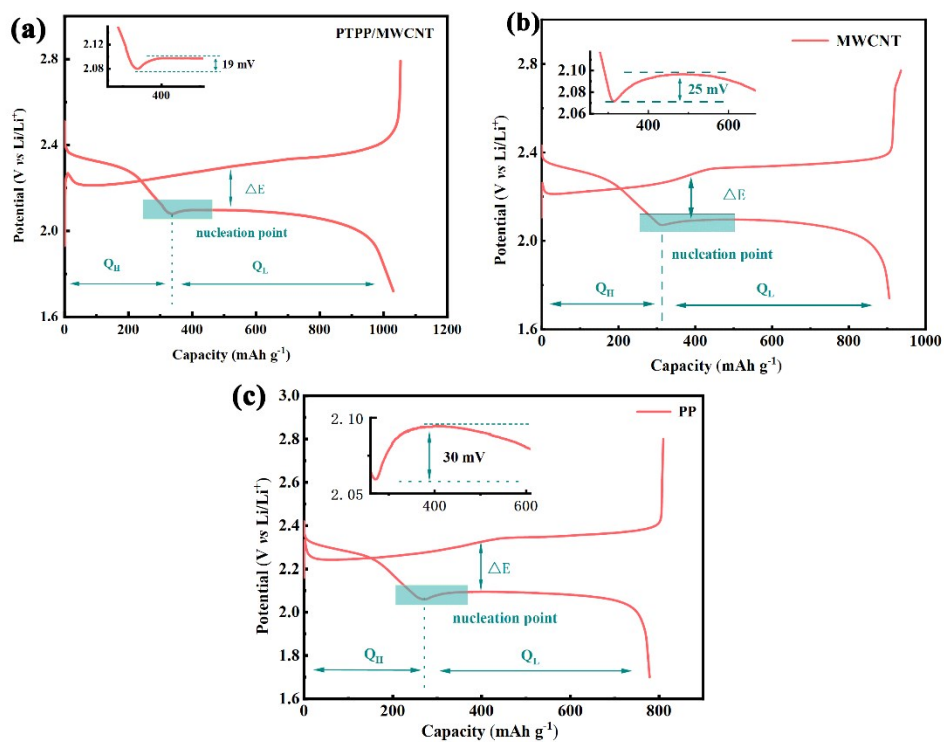

**Fig. S11.** Galvanostatic discharge-charge profiles of PTPP/MWCNT (a), MWCNT (b) and PP (c) separators.

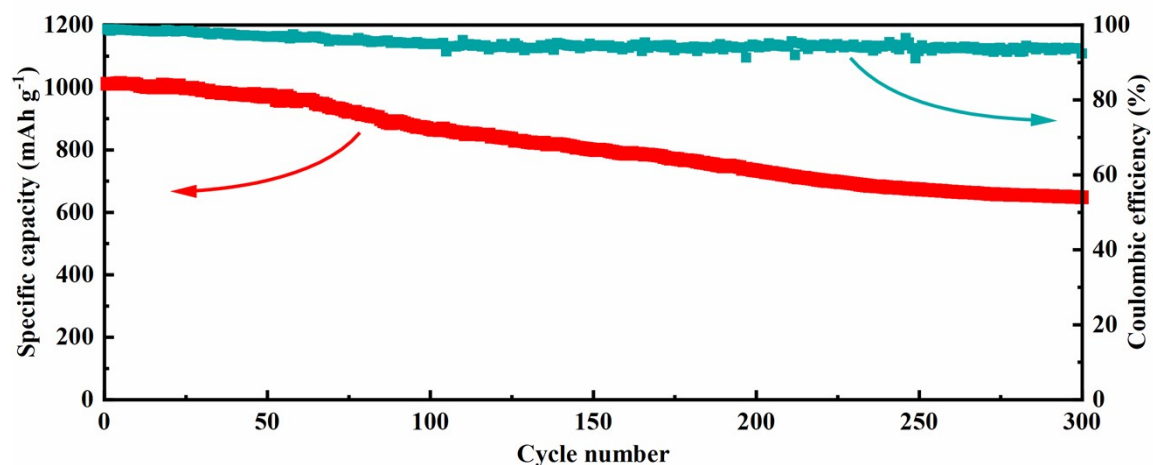

**Fig. S12.** Cycle stability and Coulombic efficiency at 0.5 C rate for 300 cycles using the cathode with 3 mg cm<sup>-2</sup> sulfur loading.

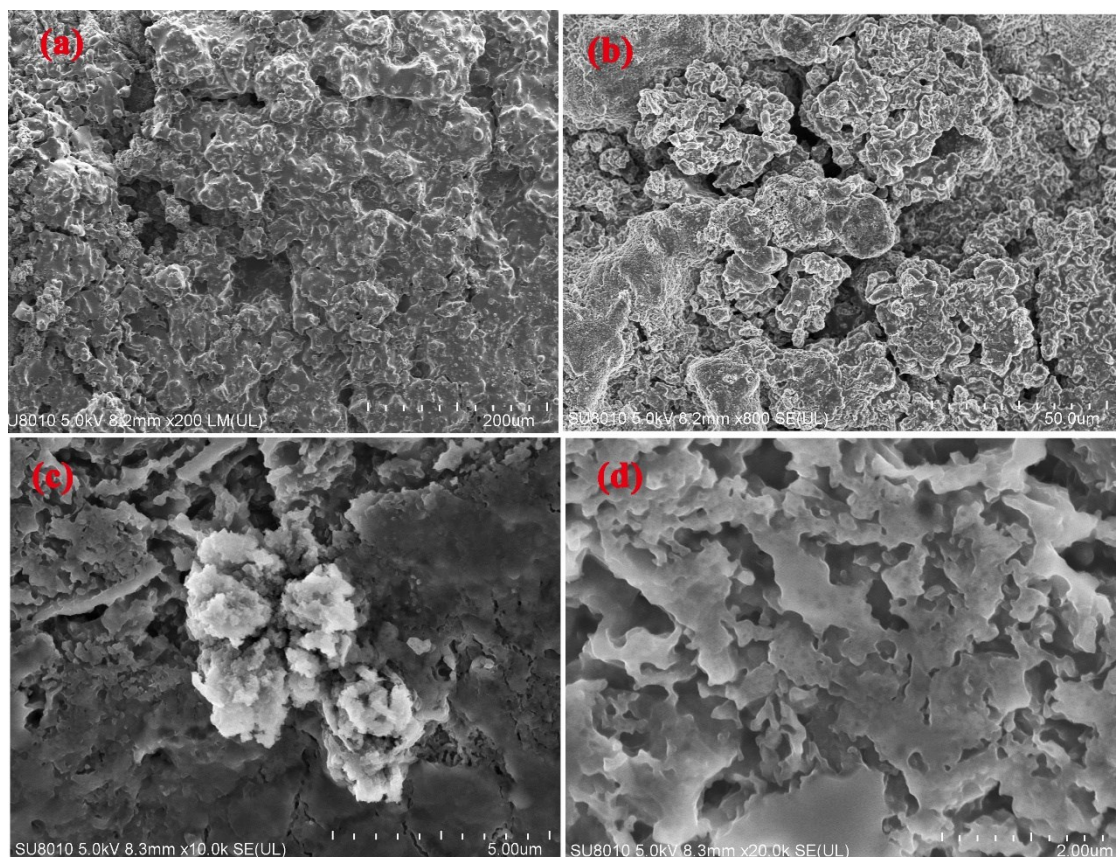

**Fig. S13.** SEM images of Li anodes from the cells with MWCNT (a, b) and PP (c, d) separators after cycles.

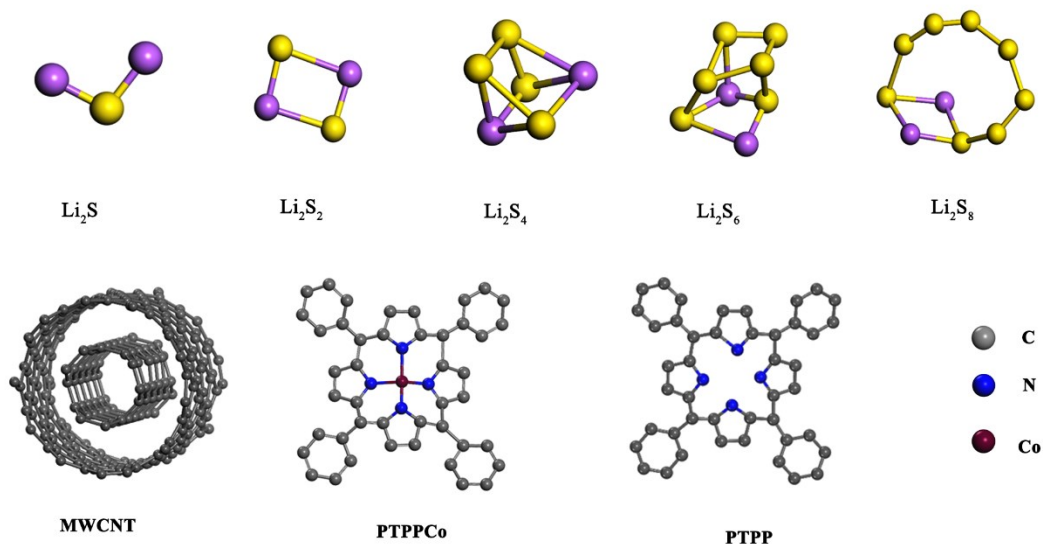

**Fig. S14.** Optimized constructions of polysulfides, MWCNT, TPP and TPPCo (the unit of the TPPCo).

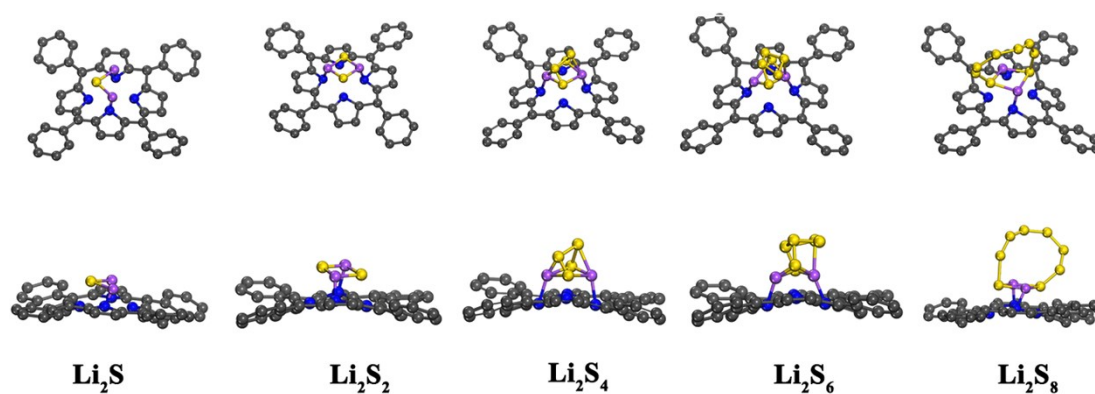

**Fig. S15.** Optimized chemisorption structures of TPP with polysulfides.

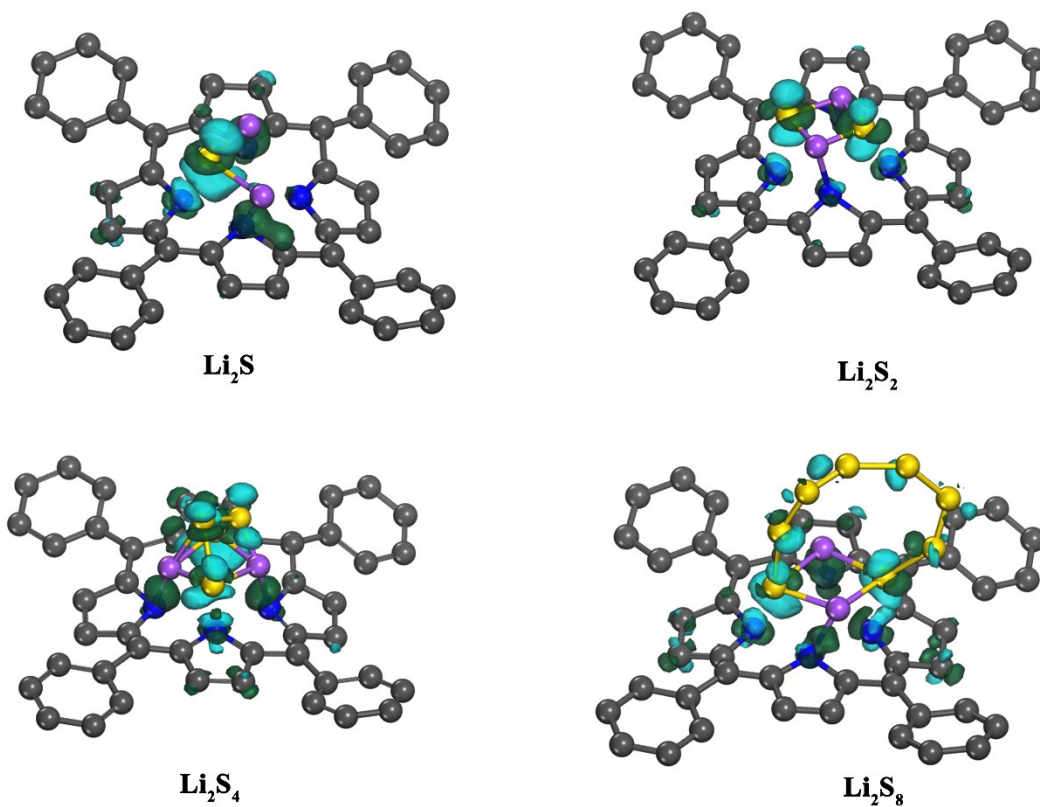

**Fig. S16.** Map of charge density difference of polysulfides adsorbed on PTPP. Light green denoted the decrease of electronic and dark green denoted electronic accumulation.

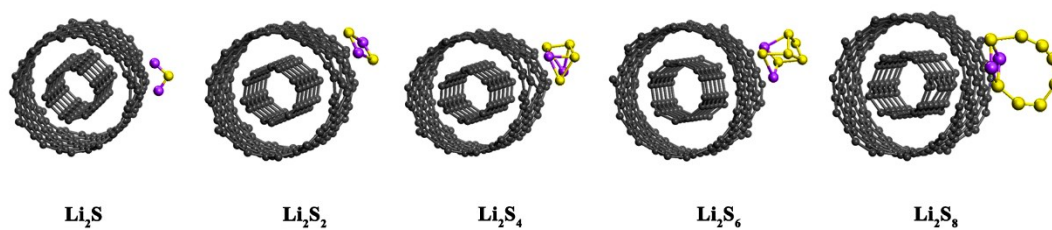

**Fig. S17.** Optimized chemisorption structures of MWCNT with polysulfides.



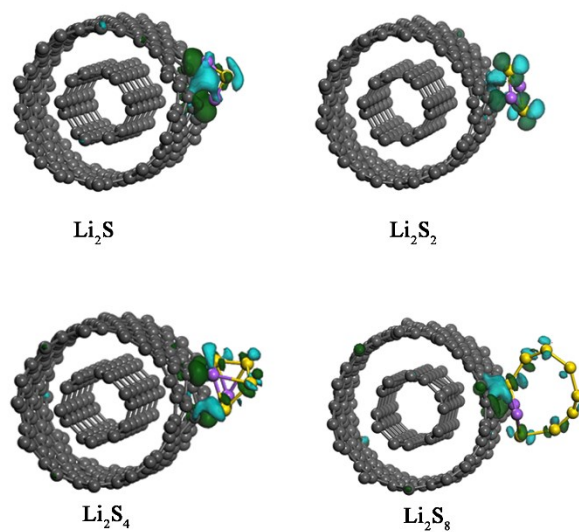

**Fig. S18.** Map of charge density difference of polysulfides adsorbed on MWCNT. Light green denoted the decrease of electronic and dark green denoted electronic accumulation.

**Table S1.** Battery performance comparison of different coating modified separator in Li-S battery.

| Coating Materials        | Thickness ( $\mu\text{m}$ ) | S loading ( $\text{mg cm}^{-2}$ ) | Rate | Capacity ( $\text{mAh g}^{-1}$ ) | Operation voltage window (V) | Ref. |
|--------------------------|-----------------------------|-----------------------------------|------|----------------------------------|------------------------------|------|
| FHCS/PP                  | 25                          | 1.2                               | 0.2  | 1427                             | 1.7–2.8                      | 5    |
| Carbon aerogel/PP        | 13                          | 0.4                               | 0.1  | 1216                             | 1.7–2.8                      | 6    |
| AB- $\text{CoS}_2$ /PP   | 12                          | 1.5                               | 0.2  | 1108                             | 1.6–2.8                      | 7    |
| CNTOH/PE                 | 8.4                         | 3                                 | 0.5  | 1056                             | 1.7–2.8                      | 8    |
| CNF/ $\text{CoS}$ /KB/PP | 10                          | 1.8                               | 0.1  | 1230                             | 1.5–3.0                      | 9    |
| CNTs/MXene/PP            | 2.7                         | 0.7                               | 0.1  | 1415                             | 1.7–2.8                      | 10   |



|                                              |      |          |     |        |         |           |
|----------------------------------------------|------|----------|-----|--------|---------|-----------|
| HCNF/MnO <sub>2</sub> /PP                    | 2    | 2.0      | 0.2 | 1156   | 1.7–2.8 | 11        |
| Fe <sub>3</sub> O <sub>4</sub> /RGO/PP       | 26   | 0.6      | 0.3 | 850    | 1.7–2.8 | 12        |
| MnO <sub>2</sub> /CNT/PP                     | 10   | 0.8      | 0.5 | 878.5  | 1.7–2.8 | 13        |
| MOF(Ni <sub>3</sub> (HITP) <sub>2</sub> )/PP | 0.34 | 3.5      | 0.2 | 1186   | 1.7–2.8 | 14        |
| MOF(UiO-66)/PP                               | 20   | 1.5      | 0.5 | 1032   | 1.7–2.8 | 15        |
| VN/PP                                        | 25   | 1.4-1.6  | 0.2 | 1280   | 1.7–2.8 | 16        |
| Mxene@Nafion/PP                              | 1    | 2.0      | 0.2 | 1234   | 1.7–2.8 | 17        |
| CoN <sub>x</sub> @NPC/G/PP                   | 25   | 90 wt%   | 0.2 | 1103   | 1.7–2.8 | 5         |
| Ce-MOF/CNT/PP                                | 8    | 2.5      | 0.4 | 1021.8 | 1.7–2.8 | 18        |
| 2D MoS <sub>2</sub> /PP                      | 0.35 |          | 0.5 | 808    | 1.7-2.8 | 19        |
| Co <sub>9</sub> S <sub>8</sub> /PP           |      |          | 1   | 986    | 1.7-2.8 | 20        |
| Co-N-C/rGO/PP                                |      |          | 0.5 | 865    | 1.7-2.8 | 21        |
| PVDF/PSSLi                                   |      |          | 0.5 | 955    | 1.7-2.8 | 22        |
| GPE/PVDF-HFP                                 |      |          | 0.1 | 895    | 1.7-2.8 | 23        |
| PAN@APP                                      |      |          | 1   | 790    | 1.7-2.8 | 24        |
| PAN/GO                                       |      |          | 0.2 | 987    | 1.7-2.8 | 25        |
| GPE/PMMA                                     |      |          | 0.3 | 986    | 1.7-2.8 | 26        |
| OV <sub>5</sub> -TiO <sub>2</sub>            | 0.5  | 66.7 wt% | 2.0 | 631    | 1.7-2.8 | 27        |
| F-doped PMIA                                 |      | 80 wt%   | 2.0 | 750    | 1.7-2.8 | 28        |
| PTPPCo/MWCNT/PP                              | 20   | 1.5      | 0.2 | 1330   | 1.7-2.8 | This work |

## Reference

- 1 X. He, Q. He, Y. Deng, M. Peng, H. Chen, Y. Zhang, S. Yao, M. Zhang, D. Xiao, D. Ma, B. Ge and H. Ji, *Nat. Commun.*, 2019, **10**, 3663.
- 2 B. Yu, D. J. Chen, Z. G. Wang, F. Qi, X. J. Zhang, X. Q. Wang, Y. Hu, B. Wang, W. L. Zhang, Y. F. Chen, J. R. He and W. D. He, *Chem Eng J*, 2020, **399**, 125837.
- 3 E. Cha, M. D. Patel, J. Park, J. Hwang, V. Prasad, K. Cho and W. Choi, *Nat. Nanotechnol.*, 2018, **13**, 337-344.
- 4 L. Wang, J. Liu, S. Haller, Y. Wang and Y. Xia, *Chem. Commun.*, 2015, **51**, 6996-6999.
- 5 Z. Cheng, H. Pan, J. Chen, X. Meng and R. Wang, *Adv. Energy Mater.*, 2019, **9**, 1901609.
- 6 H. Liao, H. Zhang, H. Hong, Z. Li and Y. Lin, *Electrochim. Acta*, 2017, **257**, 210-216.
- 7 L. Zhu, L. You, P. Zhu, X. Shen, L. Yang and K. Xiao, *ACS Sustainable Chem. Eng.*, 2018, **6**, 248-257.
- 8 X. Wang, W. Lei, R. Hu, P. Xia, Y. Pan, Z. Ma, N. Zhao and Y. Wang, *Ionics*, 2020, **26**, 4473-4477.
- 9 R. Ponraj, A. G. Kannan, J. H. Ahn, J. H. Lee, J. Kang, B. Han and D.-W. Kim, *ACS Appl. Mater. Interfaces*, 2017, **9**, 38445-38454.
- 10 Y. Yang, S. Wang, L. Zhang, Y. Deng, H. Xu, X. Qin and G. Chen, *Chem Eng J*, 2019, **369**, 77-86.
- 11 N. Li, W. Cao, Y. Liu, H. Ye and K. Han, *Colloids Surf., A*, 2019, **573**, 128-136.
- 12 P. Cheng, P. Guo, D. Liu, Y. Wang, K. Sun, Y. Zhao and D. He, *J Alloy Compd*, 2019, **784**, 149-156.

- 13 D. Tian, X. Song, M. Wang, X. Wu, Y. Qiu, B. Guan, X. Xu, L. Fan, N. Zhang and K. Sun, *Adv Energy Mater*, 2019, **9**, 1901940.
- 14 Y. Zang, F. Pei, J. Huang, Z. Fu, G. Xu and X. Fang, *Adv Energy Mater*, 2018, **8**, 1802052.
- 15 Y. Fan, Z. Niu, F. Zhang, R. Zhang, Y. Zhao and G. Lu, *ACS Omega*, 2019, **4**, 10328-10335.
- 16 Y. Song, S. Zhao, Y. Chen, J. Cai, J. Li, Q. Yang, J. Sun and Z. Liu, *ACS Appl. Mater. Interfaces*, 2019, **11**, 5687-5694.
- 17 J. Wang, P. Zhai, T. Zhao, M. Li, Z. Yang, H. Zhang and J. Huang, *Electrochim. Acta*, 2019, **320**, 134558.
- 18 X.-J. Hong, C.-L. Song, Y. Yang, H.-C. Tan, G.-H. Li, Y.-P. Cai and H. Wang, *ACS Nano*, 2019, **13**, 1923-1931.
- 19 K. Zhang, Z. Chen, R. Ning, S. Xi, W. Tang, Y. Du, C. Liu, Z. Ren, X. Chi, M. Bai, C. Shen, X. Li, X. Wang, X. Zhao, K. Leng, S. J. Pennycook, H. Li, H. Xu, K. P. Loh and K. Xie, *ACS Appl. Mater. Interfaces*, 2019, **11**, 25147-25154.
- 20 J. He, Y. Chen and A. Manthiram, *Energ Environ Sci*, 2018, **11**, 2560-2568.
- 21 G. Chen, X. Song, S. Wang, Y. Wang, T. Gao, L.-X. Ding and H. Wang, *J. Membr. Sci.*, 2018, **548**, 247-253.
- 22 Y. Lin, R. Pitcheri, J. Zhu, C. Jiao, Y. Guo, J. Li and Y. Qiu, *J Alloy Compd*, 2019, **785**, 627-633.
- 23 P. Shanthi, P. Hanumantha, T. Albuquerque, B. Gattu and P. Kumta, *ACS Appl. Energy Mater.*, 2018, **1**, 483-494.
- 24 T. Lei, W. Chen, Y. Hu, W. Lv, X. Lv, Y. Yan, J. Huang, Y. Jiao, J. Chu, C. Yan, C. Wu, Q. Li, W. He and J. Xiong, *Adv Energy Mater*, 2018, **8**, 1802441.
- 25 J. Zhu, C. Chen, Y. Lu, J. Zang, M. Jiang, D. Kim and X. Zhang, *Carbon*, 2016, **101**, 272-280.
- 26 S. Chen, X. Han, J. Luo, J. Liao, J. Wang, Q. Deng, Z. Zeng and S. Deng, *Chem Eng J*, 2020, **385**, 123457.
- 27 Z. Li, C. Zhou, J. Hua, X. Hong, C. Sun, H.-W. Li, X. Xu and L. Mai, *Adv. Mater.*, 2020, **32**, 1907444.
- 28 N. Deng, Y. Liu, Q. Li, J. Yan, L. Zhang, L. Wang, Y. Zhang, B. Cheng, W. Lei and W. Kang, *Chem. Eng. J.*, 2019, **382**, 122918.
